# Supplementary material for: Using ultrashort optical pulses to couple ferroelectric and ferromagnetic order in an oxide heterostructure
Source: Springer Nature journal article supplement (doi:10.1038/ncomms6832), 2014-12-23
Supplement: 41467_2014_BFncomms6832_MOESM1502_ESM.pdf [file 41467_2014_BFncomms6832_MOESM1502_ESM.pdf]

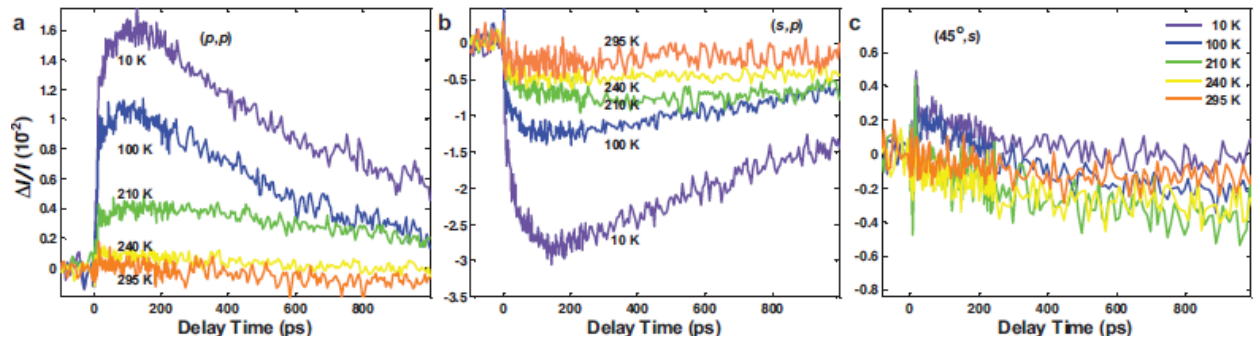

**Supplementary Figure 1. The evolution of the photoinduced changes in SHG intensity ( $\Delta I/I$ ) versus delay time and temperature, mediated through strain.  $\Delta I/I$  from polar combinations of (a)  $(p,p)$ , (b)  $(s,p)$ , and (c)  $(45^\circ,s)$  are shown, measured at various temperatures.**

---

**Supplementary Table 1.**

The various polarization combinations probe the coefficients  $(a, b, c)$ , allowing us to extract  $(d_{15}, d_{31}, d_{33})$ . Each coefficient  $(a, b, c)$  is a function,  $f$ , of  $(d_{15}, d_{31}, d_{33})$  and  $\theta$ .

|                            | $(45^\circ, s)$ | $(s, p)$       | $(p, p)$                                 |
|----------------------------|-----------------|----------------|------------------------------------------|
| SHG dipole                 | $P_y(2\omega)$  | $P_z(2\omega)$ | $P_x(2\omega), P_z(2\omega)$             |
| $(a, b, c)$                | $c=f(d_{15})$   | $b=f(d_{31})$  | $a=f(d_{15}, d_{31}, d_{33})$            |
|                            | $> 0$           | $< 0$          | $> 0$                                    |
| $(d_{15}, d_{31}, d_{33})$ | $d_{15} = -1.2$ | $d_{31} = -1$  | $d_{15} = -1.2, d_{31} = -1, d_{33} = 7$ |

## Supplementary Note 1. General picture of quasiparticle relaxation in ferromagnetic manganites

Quasiparticle relaxation in a FM manganite (e.g., LCMO) after photoexcitation is governed by the following major processes, roughly separated in time: (a) electron-electron ( $e-e$ ) scattering ( $<100$  fs), (b) electronphonon ( $e-ph$ ) coupling ( $\sim 1$  ps), (c) spin-lattice ( $s-l$ ) relaxation ( $\sim 30-100$  ps), and (d) thermal diffusion ( $>0.5$  ns), both within the film and in the substrate. Initially, the photoexcited quasiparticles have  $\sim 1.5$  eV per electron-hole pair. After  $e-e$  scattering, the quasiparticles develop a Fermi-Dirac distribution with a defined electronic temperature  $T_e$ . This process is very fast (within a hundred femtoseconds) and is usually not resolved within the laser pulse width ( $\sim 100$  fs). The excited quasiparticles can then interact with the spins and lattice. For a quasiparticle to flip its spin, the total angular momentum is conserved, which in turn only allows demagnetization through exchange of angular momentum between the spin and orbital degrees of freedom [1, 2]. Therefore, the energetic carriers first relax through  $e-ph$  coupling, which increases the lattice temperature,  $t \sim 1$  ps in Fig. 2a. Now the lattice can interact with the spins, and through phonon or impurity scattering the spin-flip process is allowed for spin relaxation, occurring on a longer timescale. This process therefore demagnetizes spins within tens of picoseconds [3-5],  $t \sim 50$  ps in Fig. 2a. LCMO then reaches quasi-equilibrium through a thermal gradient that slowly diffuses towards both the substrate and BSTO layer, finally dissipating through the substrate ( $t > 0.5$  ns in Fig. 2a).

We performed optical pump-probe measurements (with 1.59 eV pump and 3.18 eV probe energies) to directly measure quasiparticle relaxation in our BSTO/LCMO heterostructure, which can provide additional insight through comparison with our time-resolved SHG data (Fig. 4). After 1 ps, the photoinduced change in SHG intensity,  $\Delta I/I$ , for (incident, detected) ( $p, p$ ) and ( $s, p$ ) polarizations, as well as the photoinduced change in reflectivity,  $\Delta R/R$ , at low temperatures can be fit using two exponential processes with time constants of  $\tau_{s-l} \sim 30-45$  ps and  $\tau_D \sim 450-650$  ps. The fast sub-ps relaxation in  $\Delta R/R$ , due to  $e-ph$  coupling, is not observed in  $\Delta I/I$ , as expected from the discussion in the main manuscript. The room temperature  $\Delta I/I$  data is best reproduced with a rise time  $\sim 7$  ps and a decay time  $\sim 600$  ps (which approximately fits all polar combinations), while the  $\Delta R/R$  data is best fitted with a rise time  $\sim 1$  ps and a decay time  $\sim 500$  ps.

## Supplementary Note 2. Magnetostriction

The simplest Hamiltonian associated with magnetostriction from  $t_{2g}$  spins and the lattice is

$$H = \sum_{ij} \frac{1}{2} k r_{ij}^2 + \sum_{ij} J_{ij}(\mathbf{r}_{ij}) \mathbf{S}_i \mathbf{S}_j, \quad (1)$$

where  $i, j$  are different atoms. When the spins are in an ordered state, the spin-spin interaction  $J_{ij}(\mathbf{r}_{ij})$ , irrespective of parallel ( $\mathbf{S}_i \mathbf{S}_j > 0, J_{ij}(\mathbf{r}_{ij}) < 0$ ) or antiparallel ( $\mathbf{S}_i \mathbf{S}_j < 0, J_{ij}(\mathbf{r}_{ij}) > 0$ ) alignment, energetically favors lattice contraction. This is due to the overall negative sign of the second term in Eq. (1). In addition, lattice contraction increases  $J_{ij}(\mathbf{r}_{ij})$ , lowering the total energy. In thermodynamic equilibrium at  $T_C$ , the second term of Eq. (1) induces a non-analytic point in the lattice constant and the correlated spins contract the lattice upon cooling [6].

## Supplementary References

- [1] R. J. Elliott, *Theory of the effect of spin-orbit coupling on magnetic resonance in some semiconductors*. Phys. Rev. **96**, 266 (1954).
- [2] Y. Yafet, *Solid State Physics* (edited by F. Seitz and D. Turnbull, Academic, New York, 1963).
- [3] R. D. Averitt and A. J. Taylor, *Ultrafast optical and far-infrared quasiparticle dynamics in correlated electron materials*. J. Phys.: Cond. Mat. **14**, R1357 (2002).
- [4] G. M. Müller et al., *Spin polarization in half-metals probed by femtosecond spin excitation*. Nat. Mater. **8**, 56 (2009).
- [5] T. Ogasawara, M. Matsubara, Y. Tomioka, M. Kuwata-Gonokami, H. Okamoto, and Y. Tokura, *Photoinduced spin dynamics in  $La_{0.6}Sr_{0.4}MnO_3$  observed by time-resolved magneto-optical Kerr spectroscopy*. Phys. Rev. B **68**, 180407 (2003).
- [6] P. G. Radaelli, D. E. Cox, M. Marezio, S. W. Cheong, P. E. Schiffer, and A. P. Ramirez, *Simultaneous structural, magnetic, and electronic transitions in  $La_{1-x}Ca_xMnO_3$  with  $x=0.25$  and  $0.50$* . Phys. Rev. Lett. **75**, 4488 (1995).
